# Supplementary material for: Structures of the mumps virus polymerase complex via cryo-electron microscopy
Source: PubMed Central journal article supplement (PMC11101452; doi:10.1038/s41467-024-48389-9), 2024-05-17
Supplement: 41467_2024_48389_MOESM1_ESM.pdf [file 41467_2024_48389_MOESM1_ESM.pdf]

# Structures of the mumps virus polymerase complex via cryo-electron microscopy

Tianhao Li<sup>1,2,3,4,8</sup>, Mingdong Liu<sup>1,2,3,8</sup>, Zhanxi Gu<sup>5,6</sup>, Xin Su<sup>1,2,3,7</sup>, Yunhui Liu<sup>1,2,3</sup>, Jinzhong Lin<sup>7</sup>, Yu Zhang<sup>6</sup>, Qing-Tao Shen<sup>1,2,3,4\*</sup>

## Affiliations:

<sup>1</sup>School of Life Sciences, Department of Chemical Biology, Southern University of Science and Technology, Shenzhen 518055, China.

<sup>2</sup>Laboratory for Marine Biology and Biotechnology, Qingdao National Laboratory for Marine Science and Technology, Qingdao 266237, China.

<sup>3</sup>Institute for Biological Electron Microscopy, Southern University of Science and Technology, Shenzhen, 518055, China.

<sup>4</sup>School of Life Science and Technology, ShanghaiTech University, Shanghai 201210, China.

<sup>5</sup>University of Chinese Academy of Sciences, Beijing 100049, China.

<sup>6</sup>Key Laboratory of Synthetic Biology, Center for Excellence in Molecular Plant Sciences, Institute of Plant Physiology and Ecology, Chinese Academy of Sciences, Shanghai 200032, China.

<sup>7</sup>State Key Laboratory of Genetic Engineering, School of Life Sciences, Zhongshan Hospital, Fudan University, Shanghai, 200438, China.

<sup>8</sup>These authors contributed equally: Tianhao Li, Mingdong Liu

\*Correspondence to shenqt@sustech.edu.cn (Q.-T.S.)

## Supplementary Materials:

Supplementary Fig.1 to Fig.11

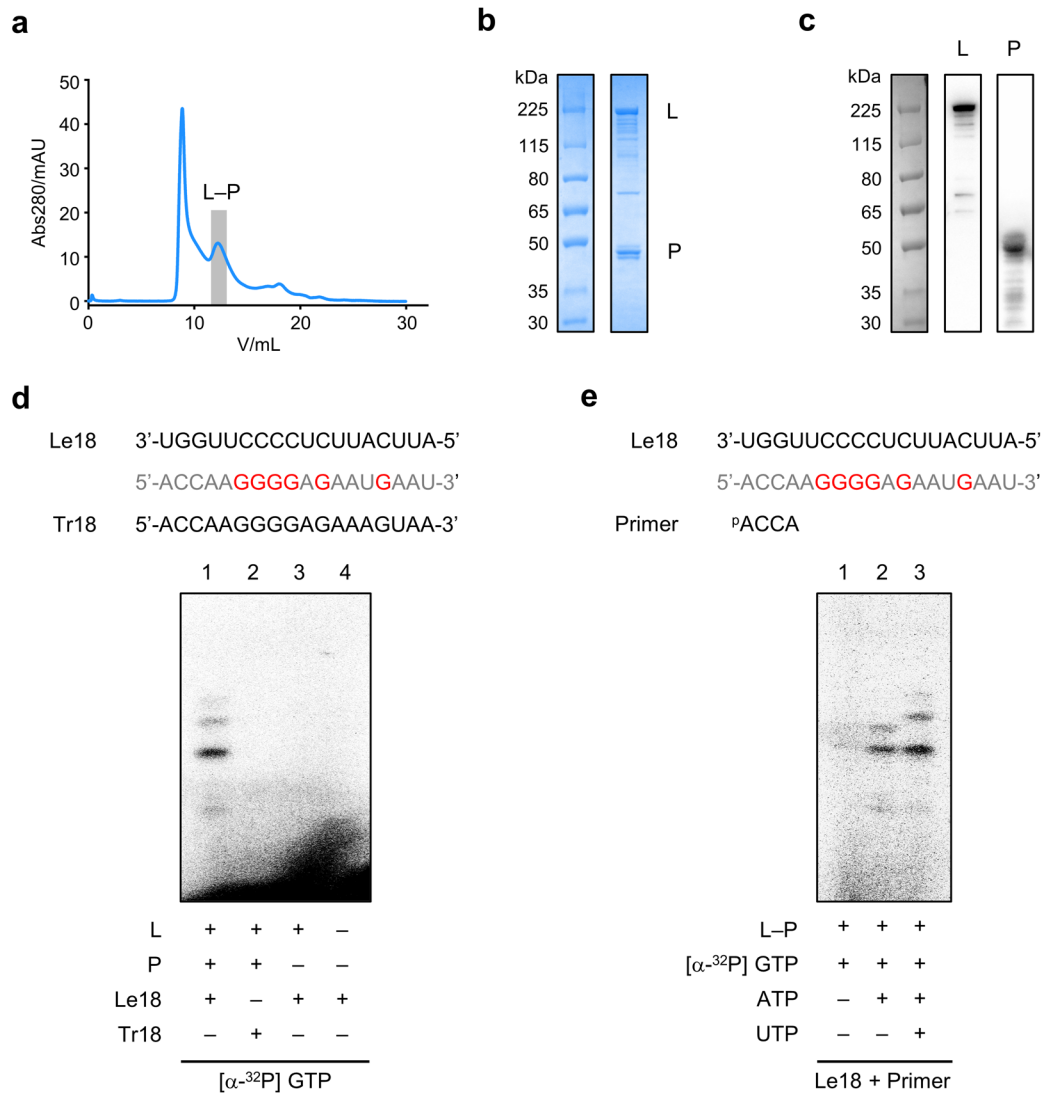

25  
 26 **Supplementary Fig. 1 Purification and verification of MuV L-P complex.** **a**, Size-exclusive  
 27 chromatogram of MuV L-P. The grey rectangle indicates the fractions collected for cryo-EM  
 28 sample preparation and verifications in **b-e**. **b,c**, The SDS-PAGE gel and western blotting profiles  
 29 of purified MuV L-P complex. **d**, The *de novo* RNA synthesis assay of MuV L-P complex. The  
 30 first 18 nucleotides of the leader sequence (Le18) are used as a template. The control is the 18  
 31 nucleotides at the 5' end of the genome (Tr18). **e**, The primer-extension assay of MuV L-P  
 32 complex. A 4-nt primer was incubated with the Le18 template before initiating the reaction. Source  
 33 data in **a-e** are provided as a Source Data file.

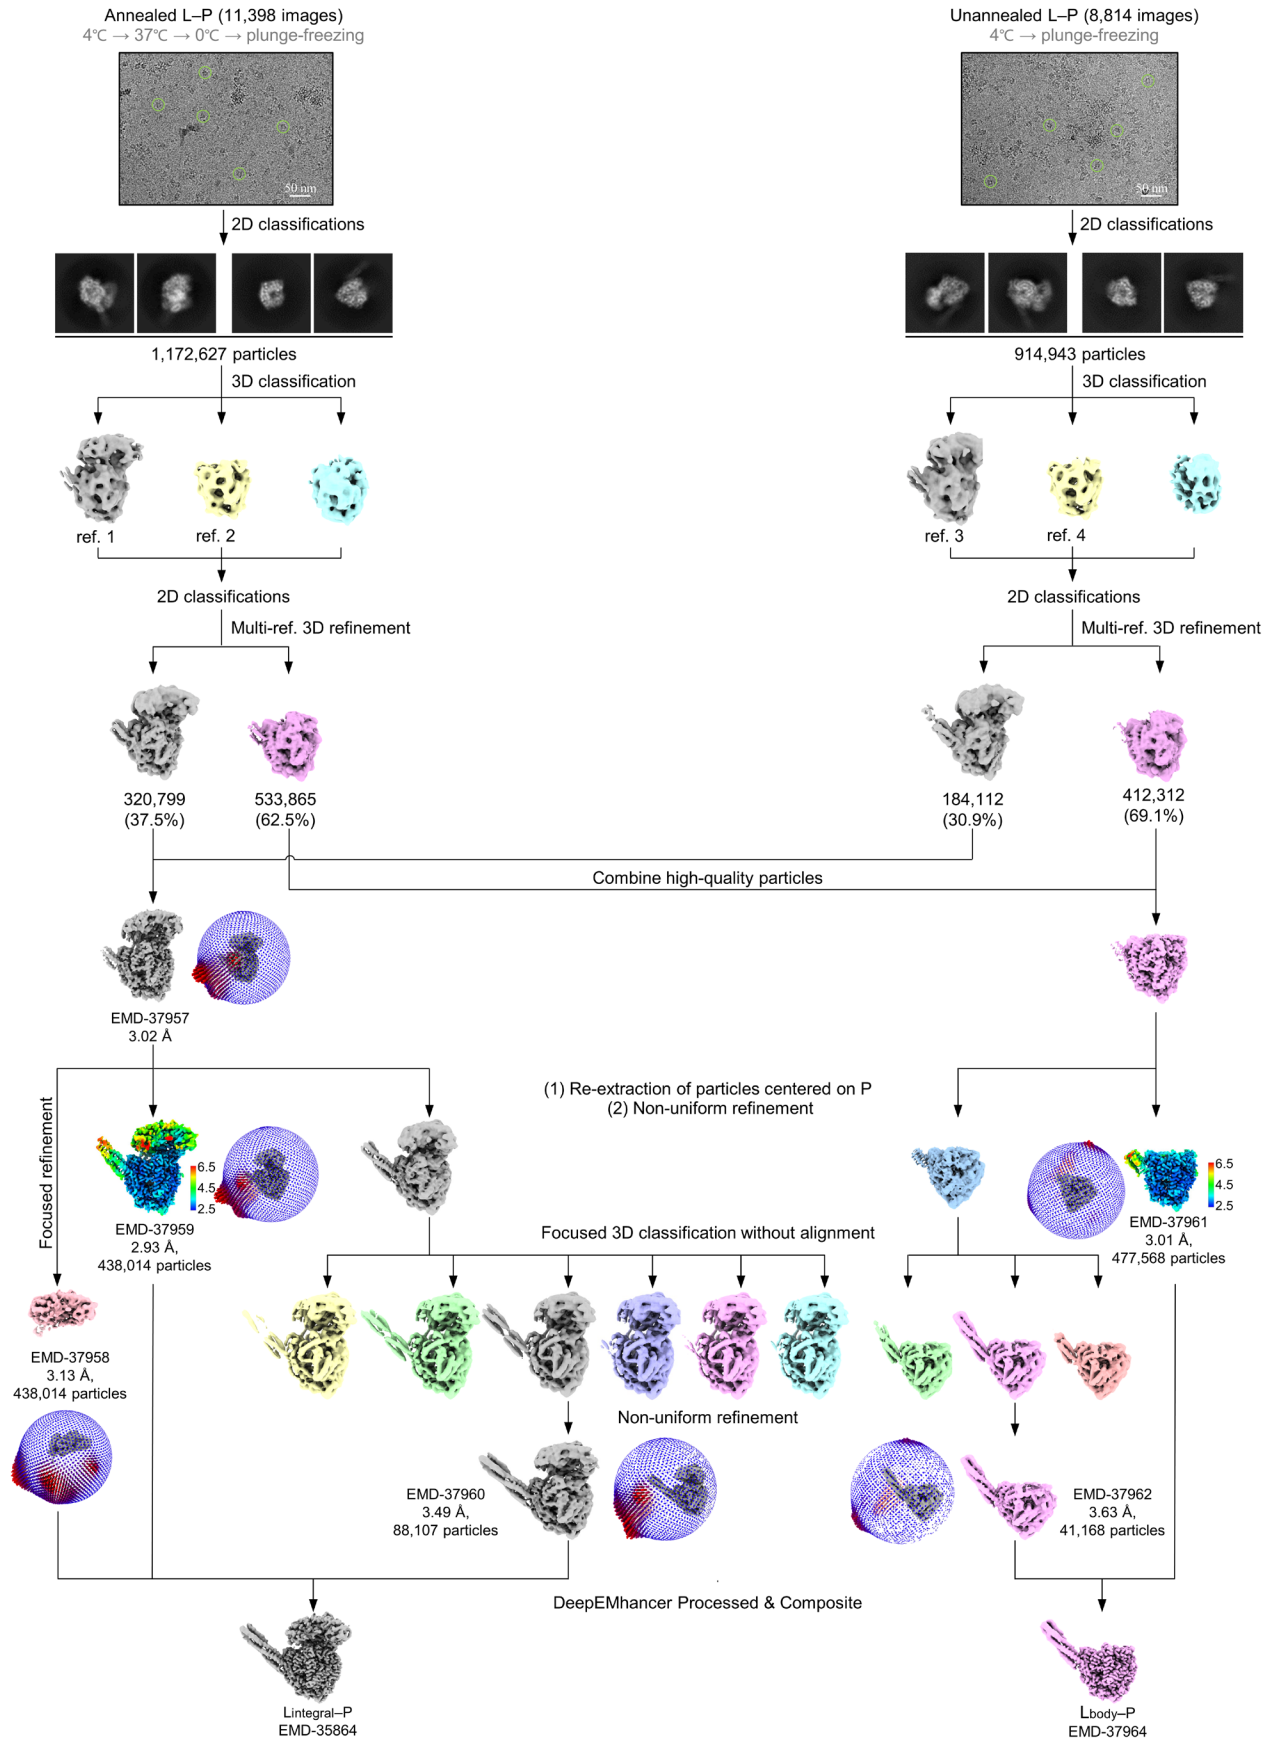

35 **Supplementary Fig. 2 Flowchart of cryo-EM data processing on MuV L–P complex.** The  
36 angular distribution of the particles for the locally refined maps is shown. Local resolution maps  
37 for MuV L<sub>integral</sub>–P (EMD-37959) and L<sub>body</sub>–P (EMD-37961) are shown.

38

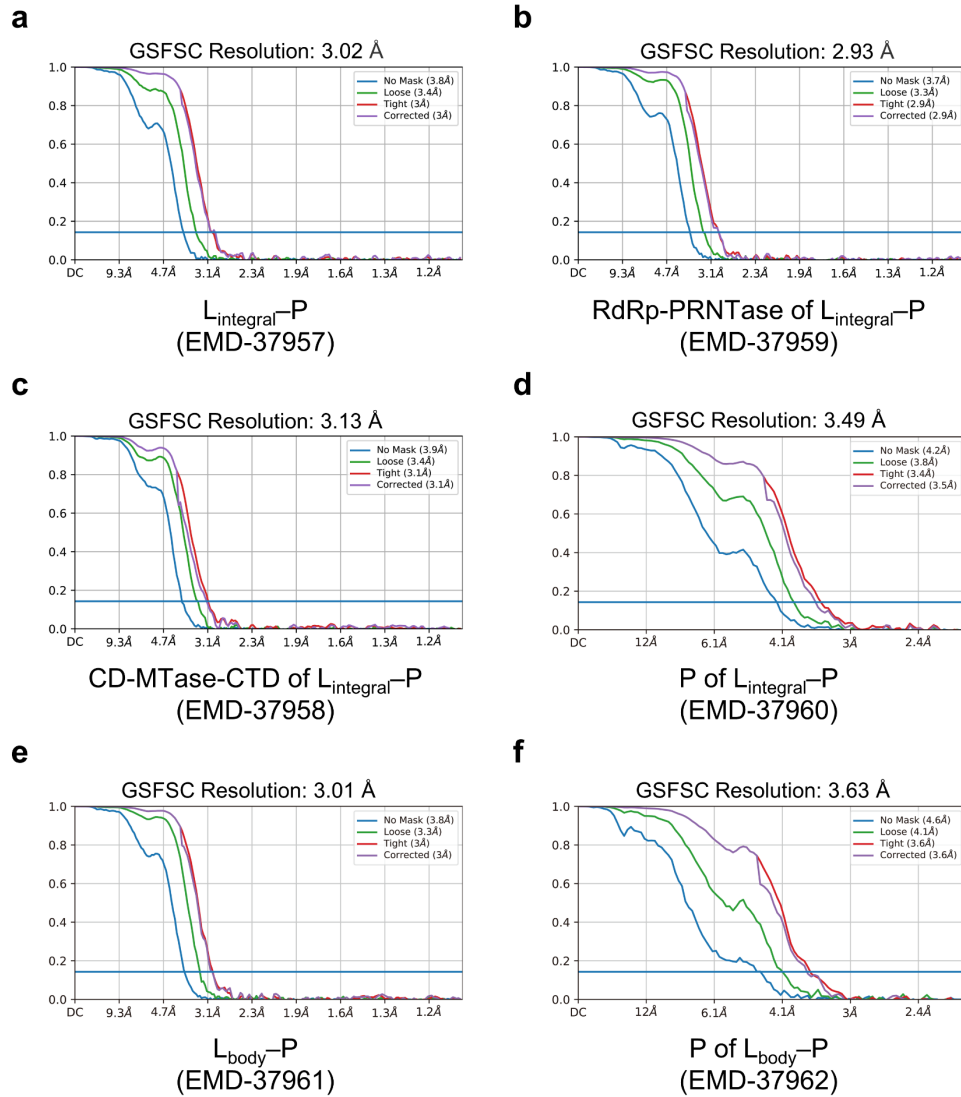

39

40 **Supplementary Fig. 3 FSC curves of MuV L-P complex. a-d, FSC curves of MuV  $L_{\text{integral}}\text{-P}$ .**

41 **e,f, FSC curves of MuV  $L_{\text{body}}\text{-P}$ .**

42

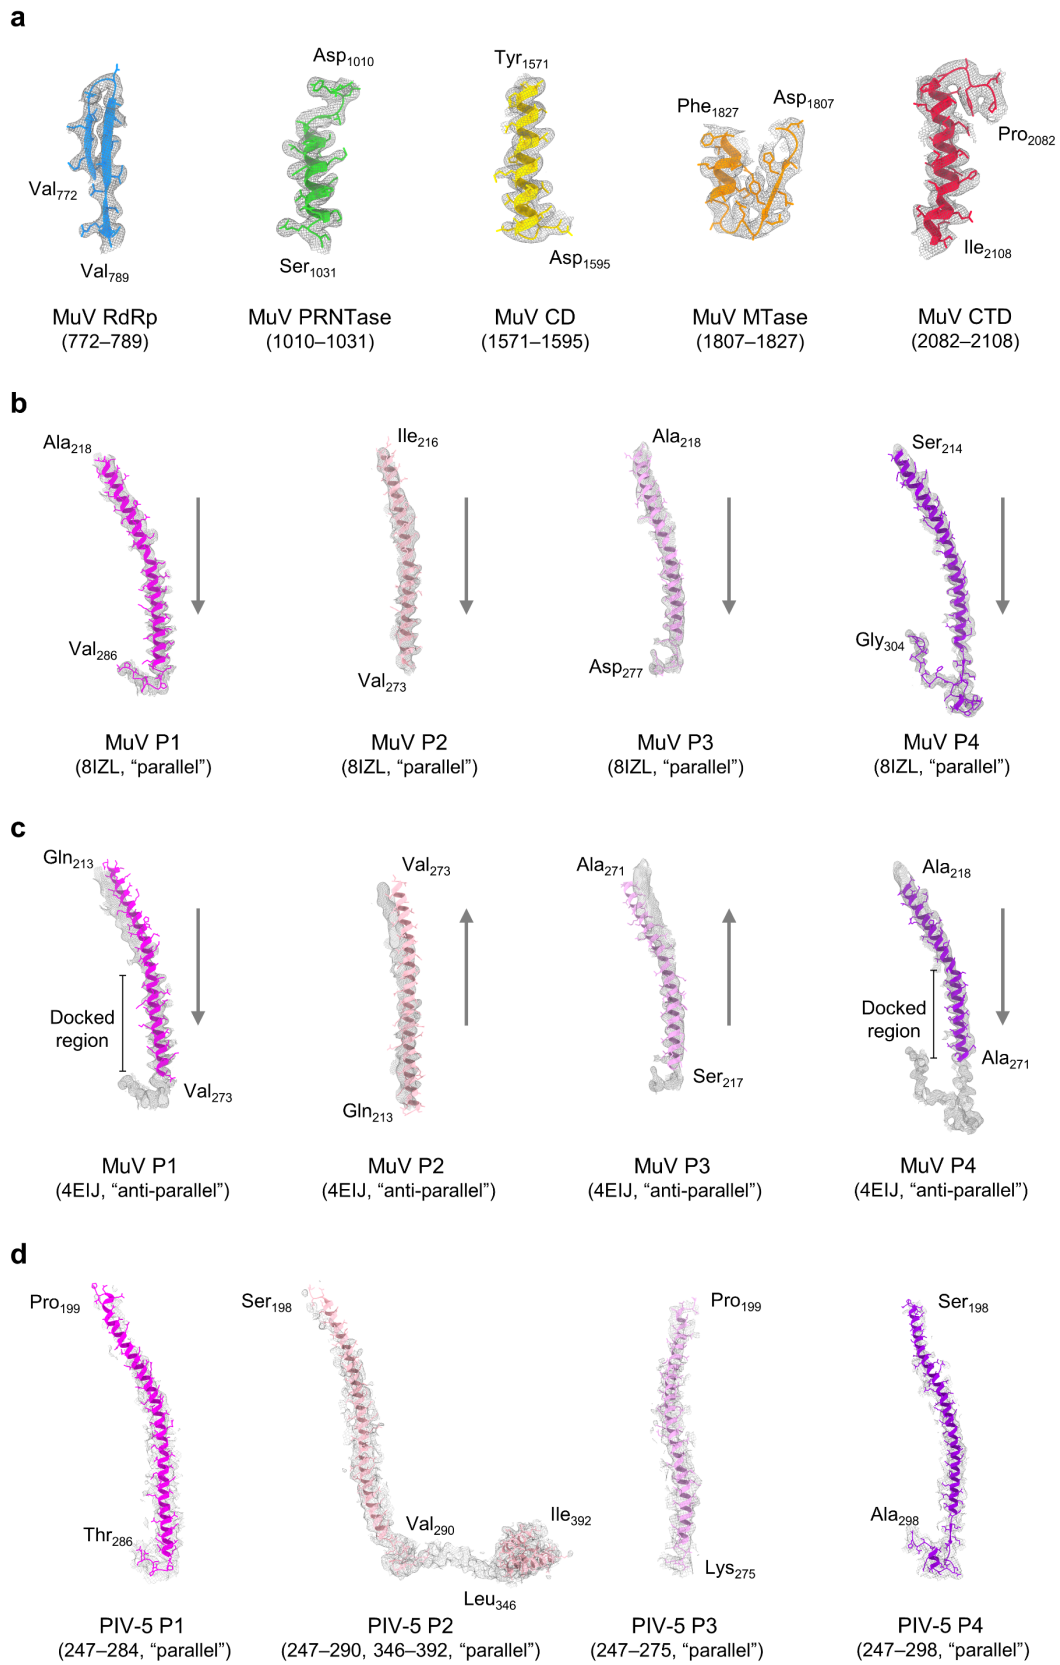

44 **Supplementary Fig. 4 Representative model fittings into L and P of MuV and PIV-5. a,**  
45 **Representative fragments of MuV L. b,** Representative fragments of four parallel MuV P  
46 molecules (PDB ID 8IZL). Arrow describes the helical direction of each P molecule. **c,**  
47 Representative fragments of four antiparallel MuV P molecules (PDB ID 4EIJ). Arrow describes  
48 the helical direction of each P molecule. **d,** Representative fragments of PIV-5 P (EMD-21095)  
49 and the respective modified atomic models after comparing MuV P with the original model (PDB  
50 ID 6V85).

51

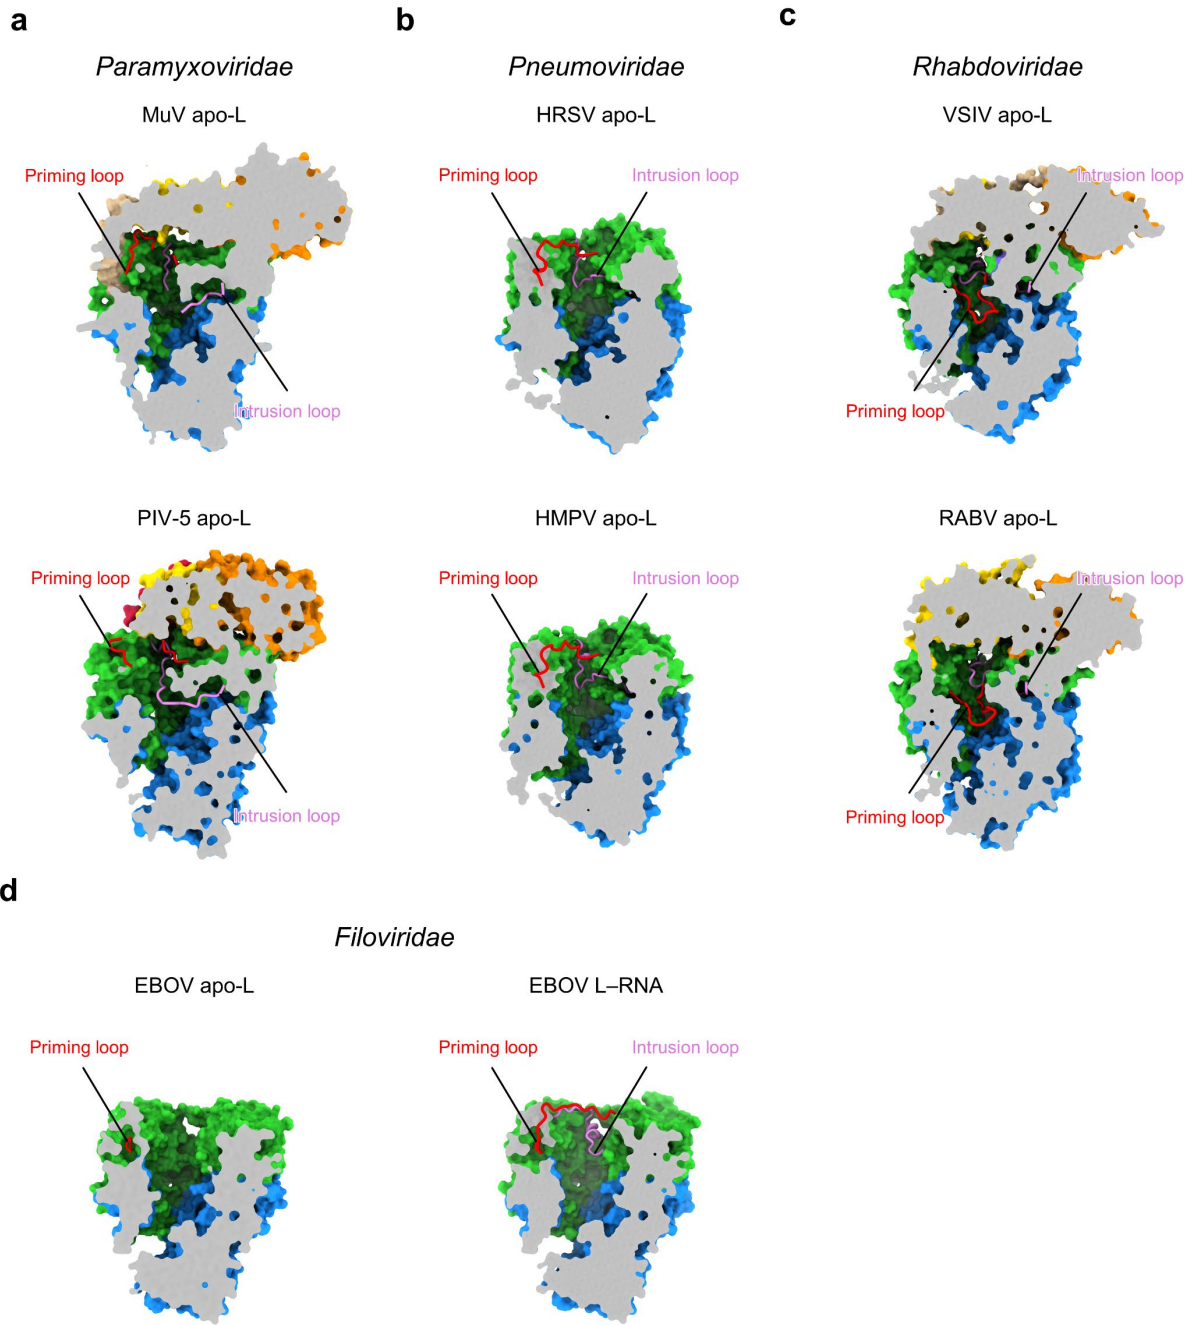

52

53 **Supplementary Fig. 5 Priming loops and intrusion loops of the structurally resolved nsNSV**

54 **L. a,** The apo-L of MuV and PIV-5 in the family *Paramyxoviridae*. **b,** The apo-L of HRSV and

55 HMPV in the family *Pneumoviridae*. **c,** The apo-L of VSIV and RABV in the family



- 56 *Rhabdoviridae*. **d**, The apo-L and RNA-binding L of EBOV in the family *Filoviridae*. Priming
- 57 loop, red; Intrusion loop, violet.

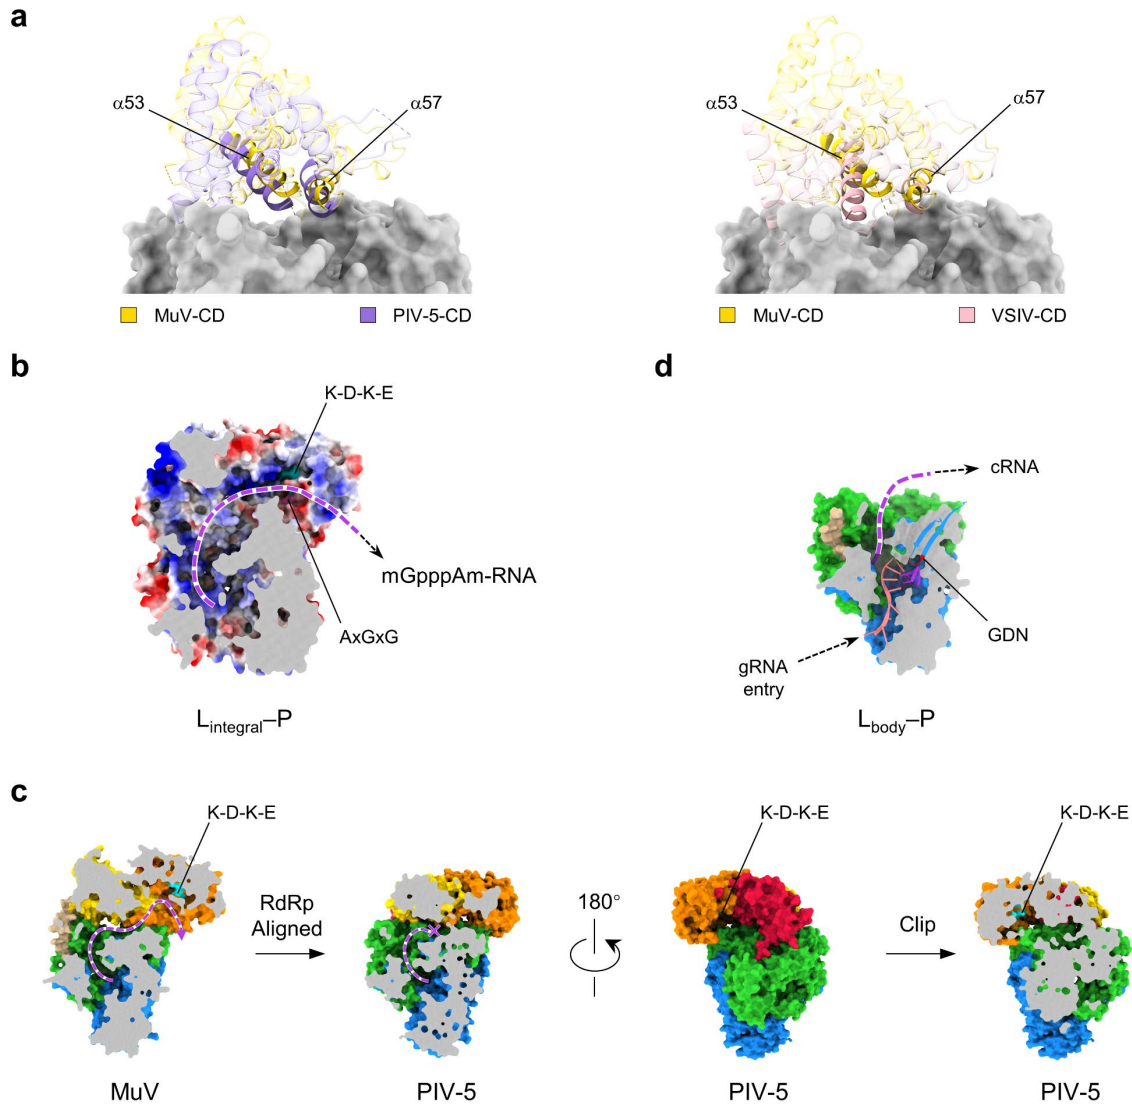

58

59 **Supplementary Fig. 6 RNA tunnel display.** **a**, Comparison of MuV, PIV-5, and VSIV L CD  
 60 positioning. Their RdRp and PRNTase are structurally aligned and displayed as grey surfaces. CD  
 61 of these three viruses are displayed as semi-transparent ribbons. Helices  $\alpha 53$  and  $\alpha 57$  are  
 62 highlighted. **b**, Electrostatic surface of MuV L. The purple dashed line indicates the positively  
 63 charged tunnel for mRNA maturation. The K-D-K-E and AxGxG motifs are colored in cyan and  
 64 hot pink, respectively. **c**, The K-D-K-E motif of PIV-5 L is not inside the RNA tunnel. **d**, Exposed  
 65 RNA cavity of MuV  $L_{\text{body}}-P$ .

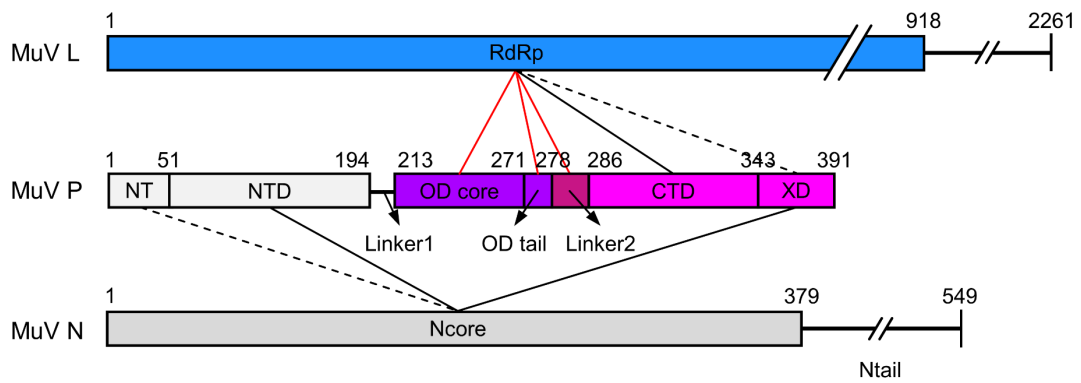

66

67 **Supplementary Fig. 7 Diagram of the MuV N-P-L interaction map.** Red lines: new

68 interactions identified in this work. Black solid lines: interactions proposed by previous studies.

69 Black dashed lines: potential interactions.

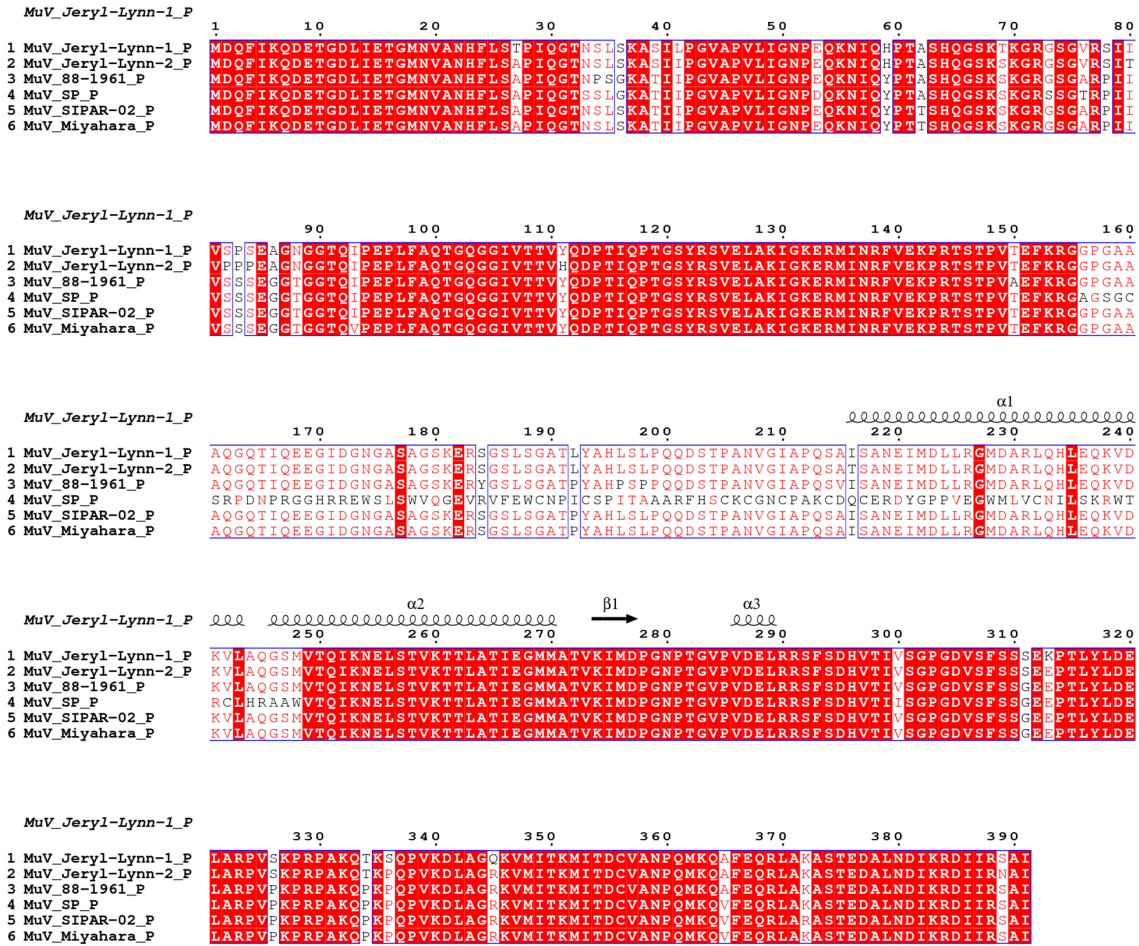

70

71 **Supplementary Fig. 8 Sequence alignment of P from six MuV strains.** Jeryl-Lynn-1, Uniport

72 ID: Q9J4L6; Jeryl-Lynn-2, Uniport ID: Q8QV71; 88-1961, Uniport ID: Q8QY72; SP, Uniport ID:

73 B5TE95; SIPAR-02, Uniport ID: Q910S3; Miyahara, Uniport ID: P30928.

74

75

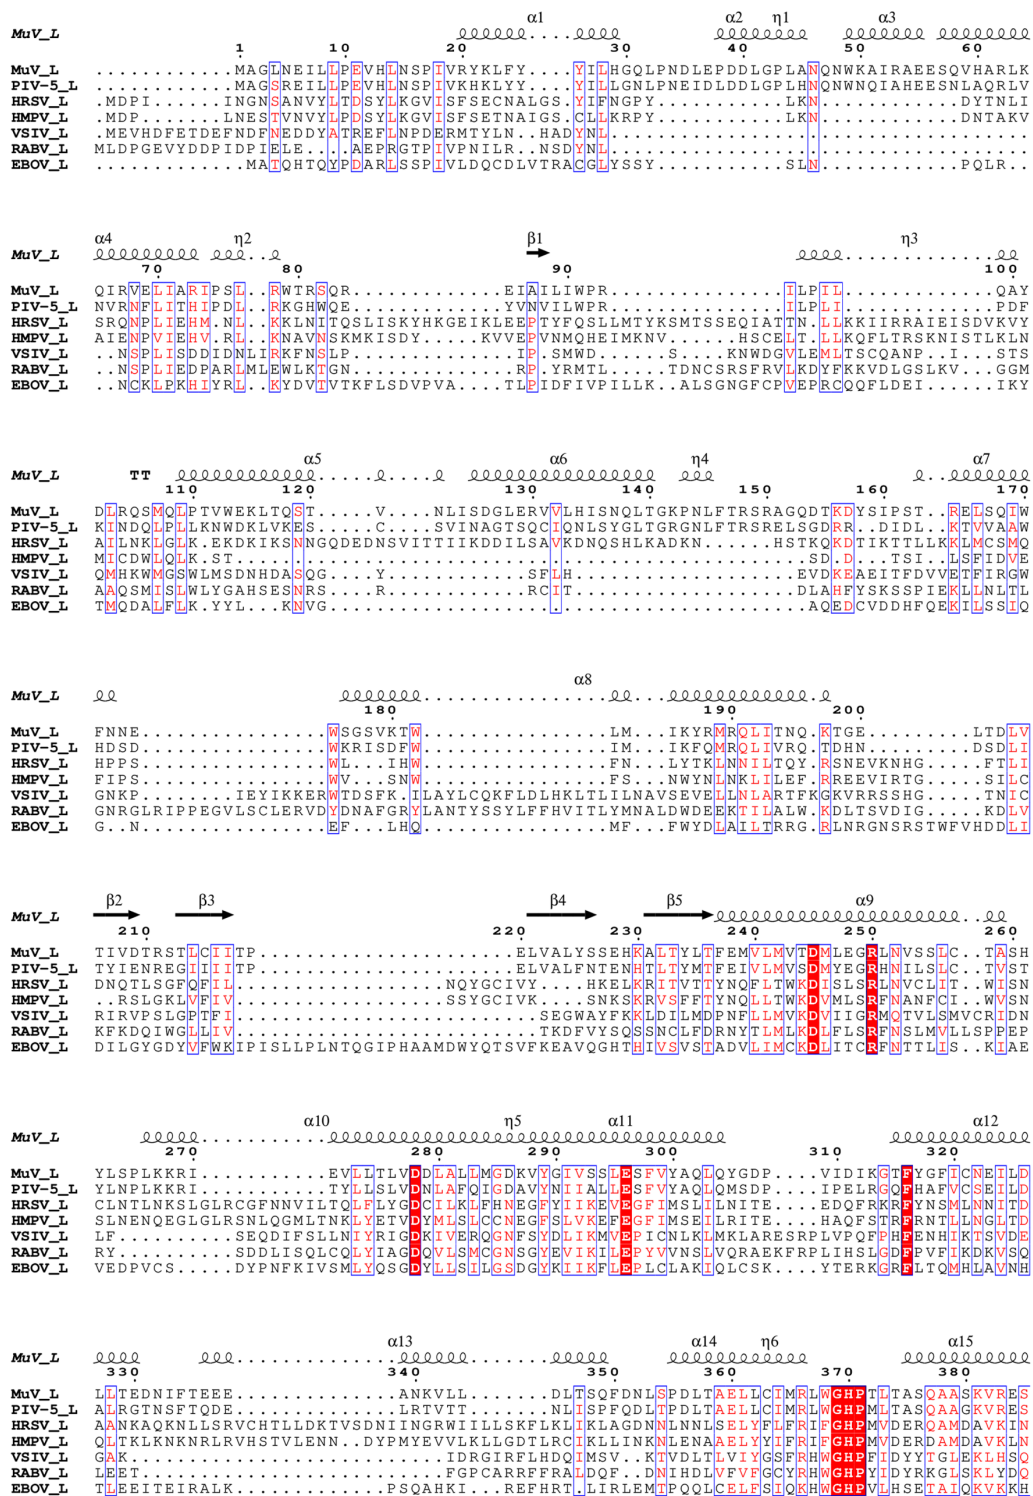

76  
77 Figure continued on the next page

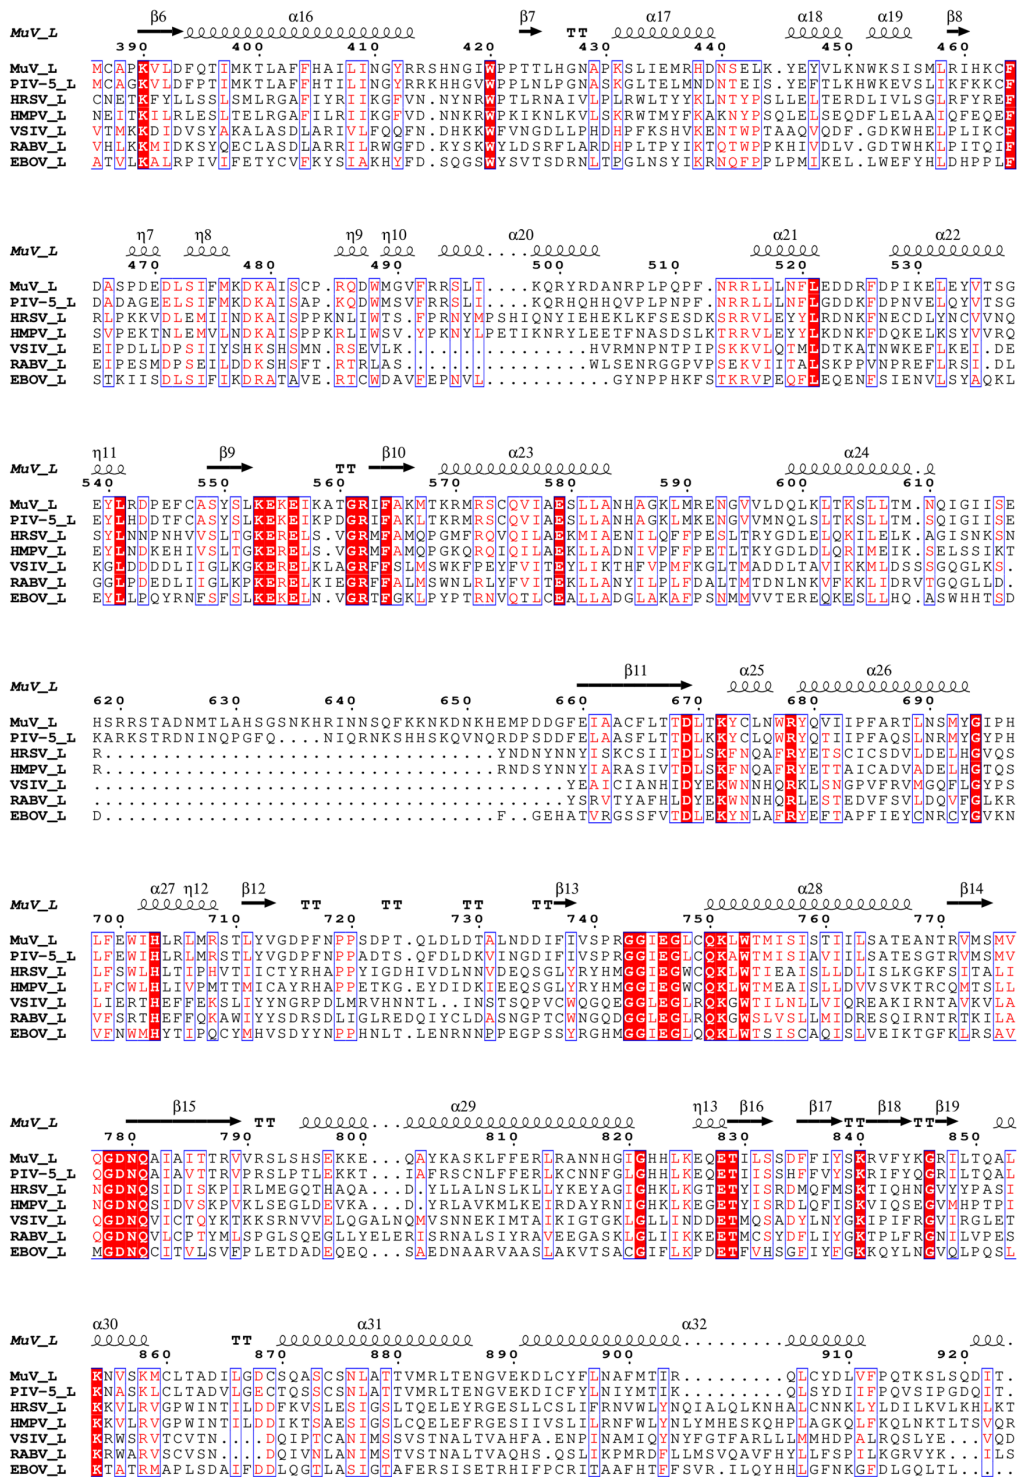

78  
79 Figure continued on the next page

$\alpha_{33}$                      $\alpha_{34}$                      $\eta_{14}$                      $\eta_{15}$                      $\alpha_{35}$                      $\alpha_{36}$   
 MuV\_L    . . . . . 930    . . . . . 940    . . . . . 950    . . . . . 960    . . . . . 970    . . . . . 980    . . . . . 990  
 MuV\_L    . NAYLNHPF I L I S R L C L L P S Q I G G L N P L S C S R L F N R N I G D P L V S A T A D V K R L I K A G C L D I W . . . . . V . . . . . L Y N  
 PIV-5\_L    . L E Y I N N P H V S R L A L L P S Q I G G L N V L S C S R L F N R N I G D P V V S A V A D L K R L I K S G C M D Y W . . . . . I . . . . . L Y N  
 HRSV\_L    F F N I D N I D T A L T L Y M N L P M L F G G D P N L L Y R S F Y R R T P D F L T E A I V H S V F L I S Y T N H D L K D K L Q D L S D D R L N K F L T C I I  
 HMPV\_L    F F E I K R E N E V V D L W M N I P M O F G G D P V V F Y R S F Y R R T P D F L T E A I S H V D I L I K I S A N . . . . . T K N E T K V S F F K A L L  
 VSIV\_L    K I P G L H S S T F K Y A M L Y L D P S L G I G V S G M S L S R F L I R A P F D P V T E S L S S W R F I H V H A R S E H L K E M S A V F G N P E I A K F . . . . .  
 RABV\_L    A E . G E S F L L A M S R I I Y L D P S L G I G S G M S L G R F H I R Q F S D P V S E G L S F W R E I W L S S Q E S N I H A L C Q E A G N P D L G E R . . . . .  
 EBOV\_L    . . G R P L D F G T I S L A L A V P Q V L G G L S F L N P E K C E Y R N L G D P V T I S G L F Q L K T Y L R M I E M D D L . . . . . F L P L .

$\alpha_{37}$                      $\alpha_{38}$                      $\alpha_{39}$   
 MuV\_L    . . . . . 990    . . . . . 1000    . . . . . 1010    . . . . . 1020    . . . . . 1030    . . . . . 1040    . . . . . 1050    . . . . . 1060    . . . . . 1070  
 MuV\_L    I L G R R P G K G K W S T L A A D E V T L N I D Y L V P S T F F L K K H A Q Y T L M E R S V N P M L R G V F S E N A A E E . . . . . E E E L A Q Y I L L D R E V V M P  
 PIV-5\_L    L L N G K P G N G S W A T L A A D E V S I N I E Y Q Y P P T A L K R H T Q Q A L M E L S T M L R G I F S D N A Q A E . . . . . E N N L R M L L D R E V I F P  
 HRSV\_L    T F D K N P . N A E F V T L M R D P Q A L G S E R O A K I T S E I N R L A V T E V L S T A P . . . . . N K I F S K S A Q H Y T T E I D L N D I M O N I E T P Y P  
 HMPV\_L    S I E K N E . R A T I T T L M R D P A V G S E R O A K V T S I N R T A V T S I L S L S P . . . . . N Q L F S D S A I H Y S R N E E E V G I I A E N I T P V P  
 VSIV\_L    . . . . . R . I T H I D K L V E D P T S L N I A M G M S P A N L K T E V K K C L I E . S R Q T I R N Q V I K D A T I Y L Y H E E D R L R S F L W S I N P L F P  
 RABV\_L    . . . . . T . L E S T R L L E D P T L N I R G G A S P T I L L K D A I R K A L Y D . E V D K V E N S E F R E A I L L S K T H R D N F I L F L I S V E P L F P  
 EBOV\_L    . I A I N P G N C T A I D F V L N P S G L N V P G S Q D L T S F L R Q I V R R T I T L S A K N K L I N T L F H A S A D F E . . . . . D E M V C K W L S S T P V M S

$\alpha_{40}$                      $\alpha_{41}$                      $\alpha_{42}$                      $\alpha_{43}$                      $\alpha_{44}$                      $\eta_{16}$   
 MuV\_L    . . . . . 1070    . . . . . 1080    . . . . . 1090    . . . . . 1100    . . . . . 1110    . . . . . 1120    . . . . . 1130    . . . . . 1140  
 MuV\_L    R V A H V I L A Q S S C G R R K O I Q G Y L D S T R T I I R Y S L E V R P L S A K K L N T V I E . . . . . Y N L L Y L S Y N L E T I E K P N I V Q P . . F L N A I N  
 PIV-5\_L    R V A H I I I E Q T S V G R R K O I Q G Y L D S T R S I M R K S L E I K P L S N R K L N E I L D . . . . . Y N I N Y L A Y N L A L L K N A I E P P T . . Y L K A M T  
 HRSV\_L    H G L R V V Y E S L P F Y K A E K I V N L I S G T K S I T N I L E K T S A I D L T D I D R A T E M M R K N I T L L I R I L P L D C . . . . . N R D K R . . E I L S M E  
 HMPV\_L    H G L R V L Y E S L P F H K A E K V V N M I S G T K S I T N L L E Q T S A I N G E D I D R A V S M M L E N L G L S R I L S V V V . . . . . D S E I . . P I K S N G  
 VSIV\_L    R F L S E F K S G T F L G V P D G L I S L P Q N S R T I R N S F K K K Y H R E L D D . . . . . L I V R S E I V S S L T H L G K L H L R R G S C K  
 RABV\_L    R F L S E L F S S S F L G I P E S I I G L I Q N S R T I R R Q R F R K S L S K T L E E . . . . . S F Y N S E I H G I S R M Q T P Q R . . . . . V G G  
 EBOV\_L    R F A A D I F S R T P S G K R L Q I L G Y L E G T R T L L A S K I I N N N T E T P V L D R L R K I T L Q R W S L W F S Y L D . . . . . H C . . D N I L A . . E . . A L T

$\alpha_{45}$                      $\beta_{20}$                      $\alpha_{47}$                      $\beta_{21}$   
 MuV\_L    . . . . . 1140    . . . . . 1150    . . . . . 1160    . . . . . 1170    . . . . . 1180    . . . . . 1190    . . . . . 1200    . . . . . 1210  
 MuV\_L    V D I C S I D I A R S L R K I S W A T L L N G R P I E G L E T P D F I E L V H G C L I I G S D E C E H C S S G D D K F T W F F L . . . . . P K G I R L D D D . . . . .  
 PIV-5\_L    L E T C S I D I A R N L R K I S W A P L L G R N L E G L E T P D F I E T A G A L I V G S G Y C E Q C A A G D N R F T W F L . . . . . P S G I E I G D D . . . . .  
 HRSV\_L    N L S . I T E L S K V R E R S W L S . . . . . N I V G V T S P S I M T D I K Y T S . . . . . . . . . . . T I S S G I I I E K Y N V N S  
 HMPV\_L    R L I . C C Q I S R P L R E S W N M . . . . . E I V G V T S P S I M T C M D V I Y A T S . . . . . . . . . . . S H L K S I I I E K F S T D R  
 VSIV\_L    M W T C S A T H A D L T R Y S W . . . . . R T V I G T T V P H P L E M L G . P Q H R K E T C A P C . . . . . N T S . G F N V V S H C D G I H D V . . . . .  
 RABV\_L    V W P C S S E R A D L L R E S W . . . . . G R K V V G T I V P H P S E M L G . L L P K S S I S C T C G . . . . . A T G G N P R V S V S V L P S F D Q S . . . . .  
 EBOV\_L    Q I T C T V D L A Q L R E Y S W A H I L P G R P L I G A T L E C M I E Q K V V W L K P Y E Q C P Q C S N A K Q P G G K P F V S V A V K H I I S A W P N A S

$\alpha_{48}$                      $\alpha_{49}$                      $\alpha_{50}$   
 MuV\_L    . . . . . 1220    . . . . . 1230    . . . . . 1240    . . . . . 1250    . . . . . 1260    . . . . . 1270    . . . . . 1280  
 MuV\_L    . P A S N P I R V P Y I G S K T D E R R V A S M A Y I R G A . S V S L R S A T L A G V Y I I A F G D T E E S W Q D A Y E L A S . . . . . T R V N L T L E Q T Q S L  
 PIV-5\_L    . L R N P I R V P Y I G S R T D E R R V A S M A Y I R G A . S S S L R A V I R L A G V Y I I A F G D T L E N W I D A L D L S H . . . . . T R V N I T L E Q L Q S L  
 HRSV\_L    L T R N G E R G T K P P W G S S T Q E K K T M P V Y N R Q V L . T K K Q D Q I D L L A K L D W V Y A S I D N K D E F M E E L S I . . . . . G T L G I Y E K A K K L  
 HMPV\_L    T T R G O R G P K S P W G S S T Q E K K L V P V Y N R Q I L . S K Q Q R E Q L E A I G K M R W V Y K G T P G L R R L L N K I C L . . . . . G S L G I S Y K C V K P L  
 VSIV\_L    . . . . . F S S R G L P A Y L G S K T S E S T S I L Q P W E R E S K V P L I K R A T R L R D A I S W F E P D S K L A M T I L S N I S L T G B E W T K R . . . . . Q H G  
 RABV\_L    . . . . . F S S R G L K G Y L G S S T S M S T O L F H A W E K V T N V H V V R K A L S L K E S I N W F I T R D S N L A Q A L I R N I M S L T G P D F L E E . . . . . A P V  
 EBOV\_L    R I S W T I G D G I P Y I G S R T E D K I G O P A I K P K C P . S A A L R E A I E L A S R L T W I T Q G S S N S D L L I K P F L E . . . . . A R V N L S V Q E L L Q M

$\beta_{22}$                      $\alpha_{51}$   
 MuV\_L    . . . . . 1290    . . . . . 1300    . . . . . 1310    . . . . . 1320    . . . . . 1330    . . . . . 1340    . . . . . 1350    . . . . . 1360  
 MuV\_L    T P L P T S A N L V H R L D D G T T Q L K F T P A S S Y A F S S . . . . . F V H I S N D C Q I L E I D D Q V T D S N L I Y Q V M I T G L A L I E T W N N . . . . . P  
 PIV-5\_L    T P L P T S A N L T H R L D D G T T T L K F T P A S S Y T F S S . . . . . F T H I S N D E Q Y L T I N D K T A D S N I Y Q L M I T G L I L E T W N N . . . . . P  
 HRSV\_L    F P Q Y L S V N Y L H R L T V S S R P C E F P A S I . P A Y R T N Y H F D T S P I N R I L T E K Y G D E I D I V E N C I S F G L S I M S V V E Q F T N C R  
 HMPV\_L    L P R F M S V N Y L H R L S V S S R P M E F P A S V . P A Y R T N Y H F D T S P I N Q A L S E R F G N E D I N L V E O N A I S C G L S I M S V V E Q L T G R S  
 VSIV\_L    . . . . . F K R T G S A L H R F S T R M S H G G F A S Q S T A A L . T R L M A T T D . . . . . T M R D L G . D O N F D F L Q A T L L Y A Q I T T . . . . . T V . . . . . A R  
 RABV\_L    . . . . . F K R T G S A L H R F S A R Y S E G G Y S V C P N L L . S H I S V S T D . . . . . T M S D L T Q D G K N Y D F M P O P L M L Y A Q T W T S E L V . . . . . Q R  
 EBOV\_L    T S B Y S G N I V H R Y N D Q Y S P H S E M A N R . M S N S A T R L I V S T N T L G E F S G G G Q S A R D S N I T R O N V I N Y A V A L P D I K F R N T E A T

$\beta_{23}$                      $\alpha_{52}$   
 MuV\_L    . . . . . 1370    . . . . . 1380    . . . . . 1390    . . . . . 1400    . . . . . 1410    . . . . . 1420  
 MuV\_L    P I N F S V . . . . . Y E T T L H L H L T G S S C I R P V E S C V V N P P L L P V P L I N V . . . . . Q M N K F V Y D P E P L S L E M . . . . . E K  
 PIV-5\_L    P I N R T F . . . . . E E S T L H L H L T G A S C V R P V D S C I L S E A L T V K P H I T V P . . . . . Y S N K F V F D E D P L S E Y E T . . . . . A K  
 HRSV\_L    P N R I I L P K L N E I H L M K . P P I F T G D V I H K L K Q V I . Q K Q H M F L P D K I S L T . Q Y V . . . . . E L F L S N K T L K S G S H V N S N L I A H K  
 HMPV\_L    P K Q V L I P Q L N E I D I M P . P P V F Q G K F N Y K L V D K I T . S D Q H I F S P D K I D M L . T L G . . . . . K M L M P T I K G Q . . . . . K T D Q F L N K  
 VSIV\_L    . . . . . G W I T S C T D Y H I A C K S C L R P I E E I T L D S S M . . . . . D Y T P D V S H V L K T W R . . . . . . . . . . . N G E . . . . . . . . . . .  
 RABV\_L    . . . . . T R L R D T F H W H L R C N R C V R I D D V T L E T S Q . . . . . I F E F D V S K R I S R M V . . . . . . . . . . . S G A . . . . . . . . . . .  
 EBOV\_L    D I Q . . . . . Y R A H L H L . T K C T R N V P A Q Y I T . . . . . Y T S L L D D L T . R Y R E N E L I Y D N N P L R G G L N C N . . . . . I S P . . . . .

80  
81 Figure continued on the next page

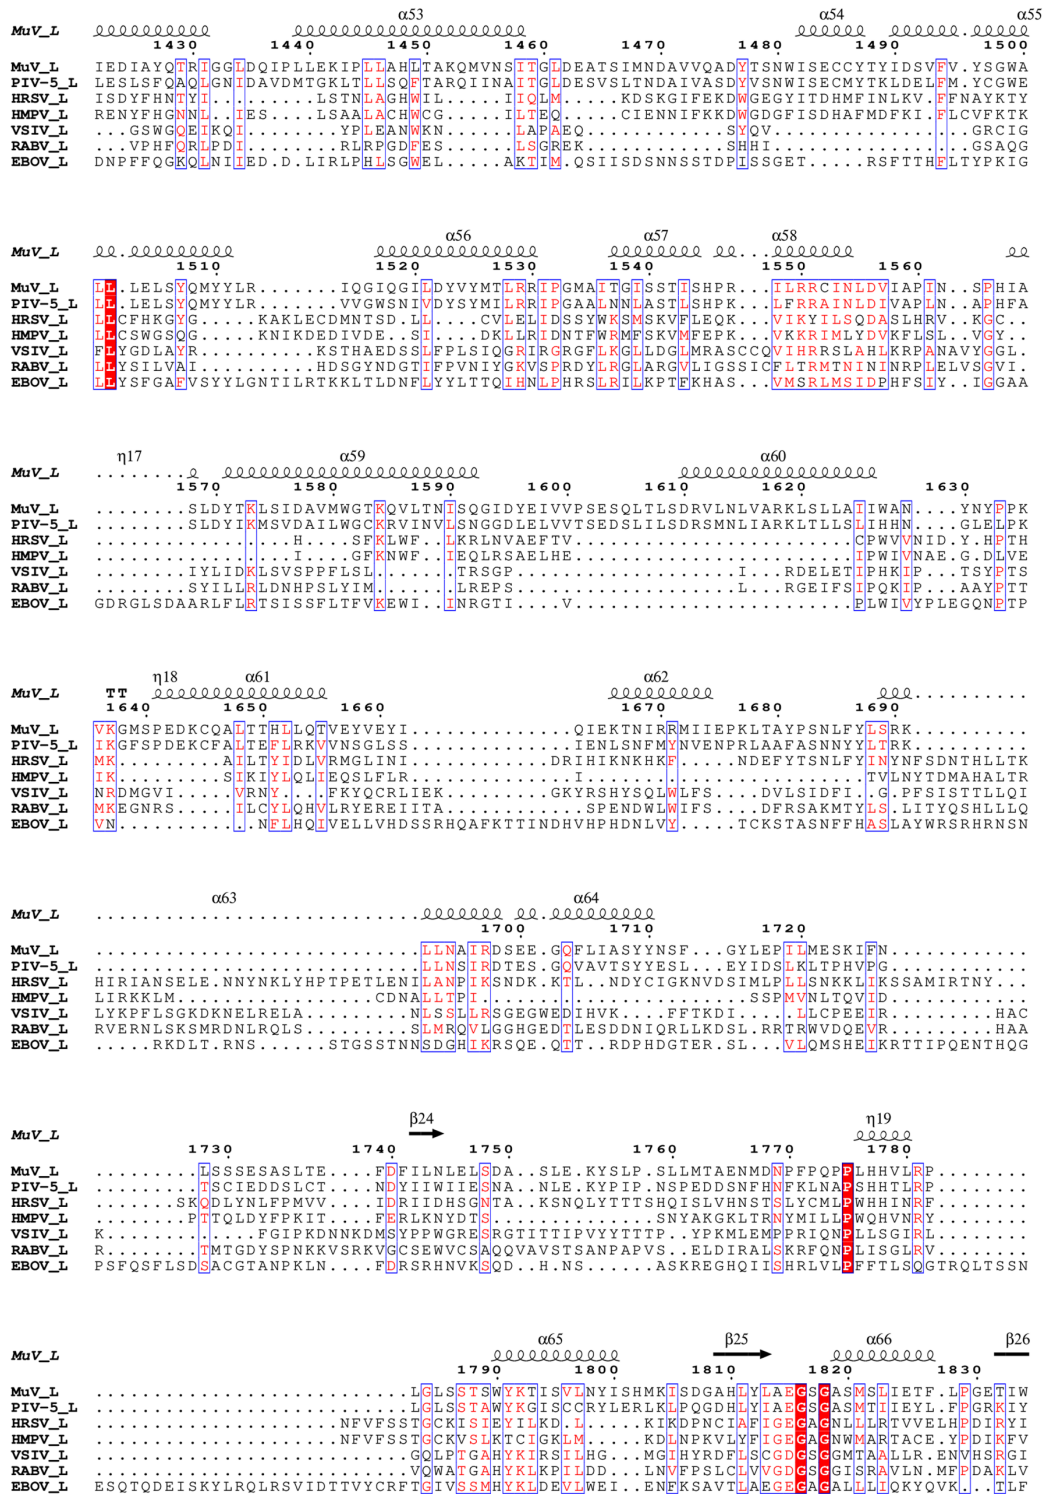

82  
83 Figure continued on the next page



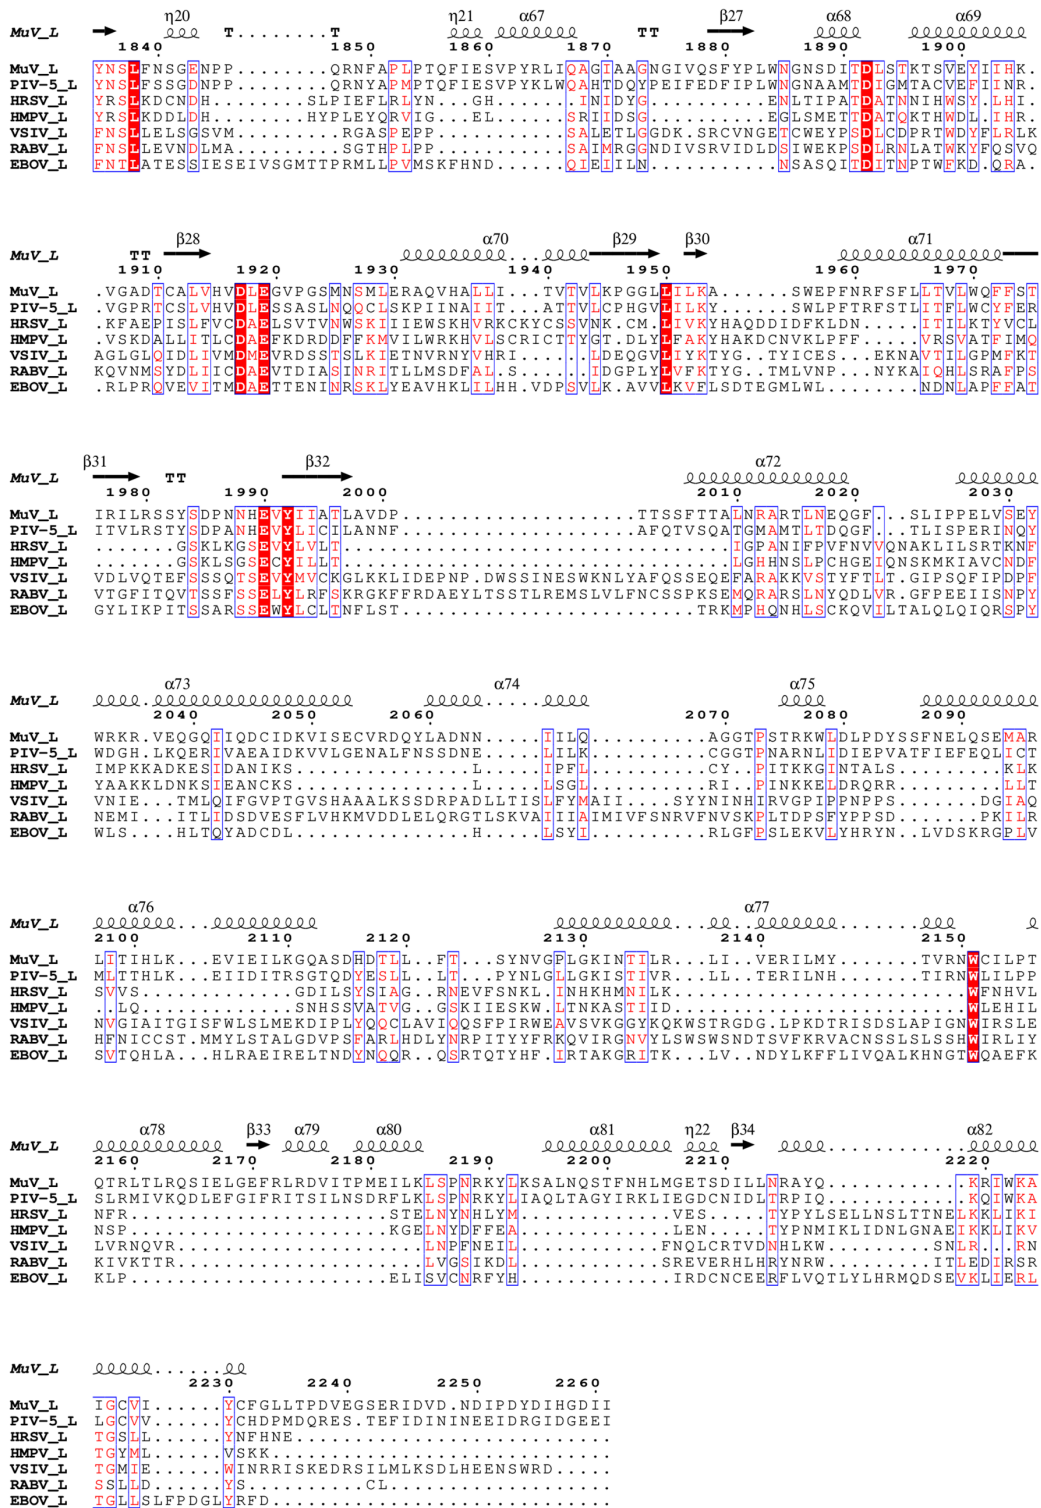

84

85 **Supplementary Fig. 9 Sequence alignment of nsNSV L. MuV, strain Jeryl-Lynn-1, Uniport ID:**

86 **Q9J4L0; PIV-5, strain W3, Uniport ID: Q88434; HRSV, strain A2, Uniport ID: P28887; HMPV,**

- 87 strain CAN97-83, Uniport ID: Q6WB93; VSIV, strain San-Juan, Uniport ID: P03523; RABV,
- 88 strain SAD-B19, Uniport ID: P16289; EBOV, Uniport ID: X5H5B6.

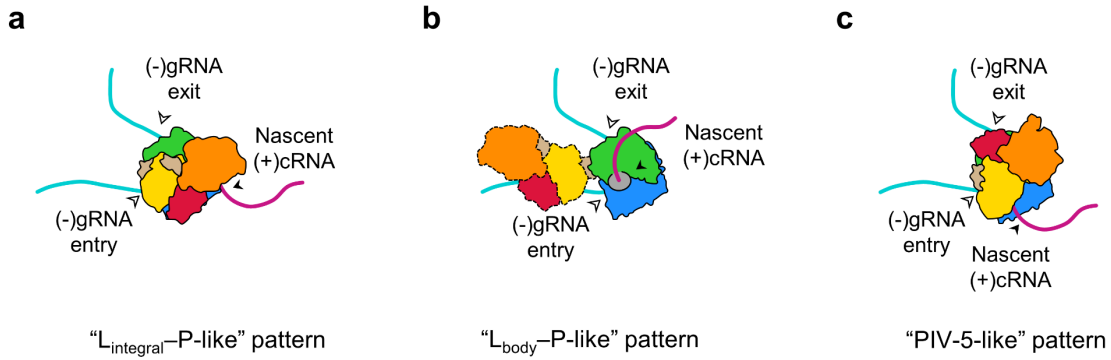

89

90 **Supplementary Fig. 10 Proposed models for genome replication of nsNSVs.** In the replication  
 91 mode, the conformation of CD-MTase-CTD determines the exit of the complementary RNA  
 92 (cRNA). **a**, L adopts the “L<sub>integral</sub>-P-like” pattern as in MuV and VSIV. “L<sub>integral</sub>-P-like” structures  
 93 may bypass the MTase domain for genome replication. **b**, L adopts the “L<sub>body</sub>-P-like” pattern as  
 94 in MuV, HRSV, HMPV, and EBOV. The appendage (CD-MTase-CTD) is not fixed on the top of  
 95 RdRp and PRNTase. The cRNA comes out directly from the central RNA cavity. **c**, L adopts the  
 96 “PIV-5-like” pattern. The cRNA comes out from the hole fenced by RdRp and CD.

97

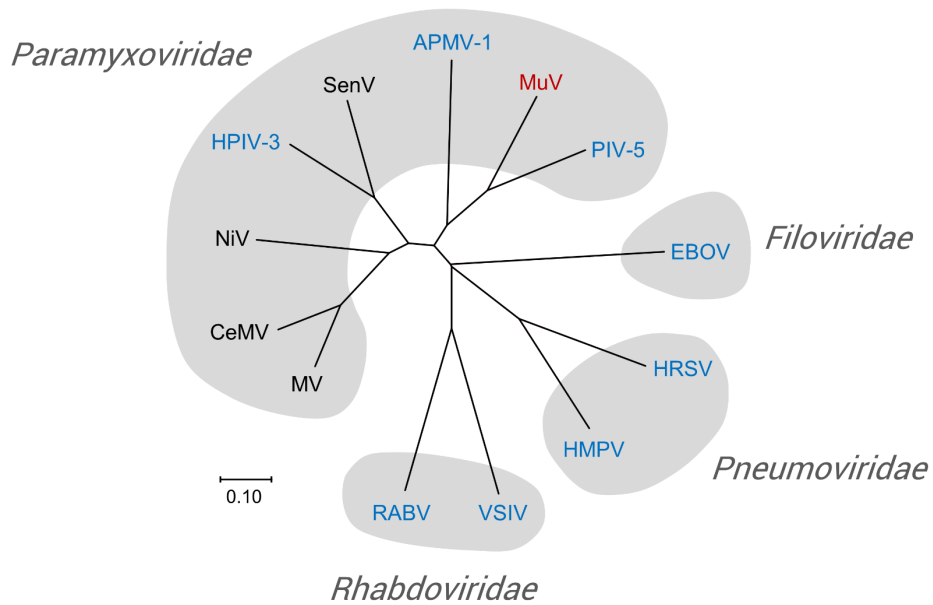

98

99 **Supplementary Fig. 11 Phylogenetic tree based on L sequences in nsNSVs.** Structurally

100 resolved polymerase complexes are labeled in blue and red. MV: measles virus; CeMV: Cetacean

101 morbillivirus; NiV: Nipah virus; HPIV-3: human parainfluenza virus 3; SenV: Sendai virus;

102 APMV-1: Newcastle disease virus; MuV: mumps virus; PIV-5: parainfluenza virus 5; EBOV:

103 Ebola virus; HRSV: human respiratory syncytial virus; HMPV: human metapneumovirus; VSIV:

104 vesicular stomatitis Indiana virus.

105
